# Supplementary material for: Modified pyridine–triazole and 2,2′-bipyrimidine ligands generating robust titanium complexes constructed around a TiO4N2 core
Source: Royal Society of Chemistry journal article supplement (doi:10.1039/d1dt03172d), 2021-01-01
Supplement: d1dt03172d1.pdf [file d1dt03172d1.pdf]

## Modified Pyridine-Triazole and 2,2'-Bipyrimidine Ligands Generating Robust Titanium Complexes Constructed Around a $\text{TiO}_4\text{N}_2$ Core†

L. Barloy,<sup>a</sup> B. Heinrich,<sup>b</sup> M. Scarpi-Luttenauer,<sup>a</sup> L. Douce,<sup>b</sup> M. Henry,<sup>a</sup> G. Khalil,<sup>a</sup> D. Klein,<sup>a</sup> N. Kyritsakas<sup>a</sup> and P. Mobian<sup>\*a</sup>

<sup>a</sup> Université de Strasbourg, CNRS, CMC UMR 7140, F-67000 Strasbourg, France

<sup>b</sup> Institut de Physique et Chimie des Matériaux de Strasbourg (IPCMS), UMR 7504, CNRS-Université de Strasbourg, F-67034 Strasbourg, France

### Supporting Information

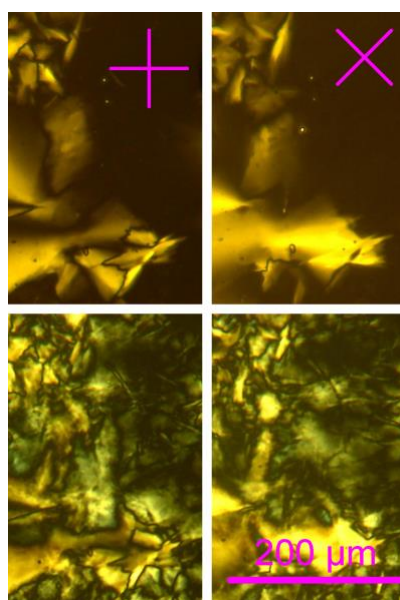

**Fig. S1** Additional POM textures of ligand **3b** in mesophases  $\text{Col}_{\text{hex}2}$  at 140°C (top) and  $\text{Col}_{\text{hex}1}$  at 100°C (bottom), for different crossed polarizers directions (purple cross). On crossing  $\text{Col}_{\text{hex}2}$ - $\text{Col}_{\text{hex}1}$  phase transition, the homeotropic areas are reversibly replaced by schlieren areas, which further confirms the changeover from an orthogonal to a tilted structure.

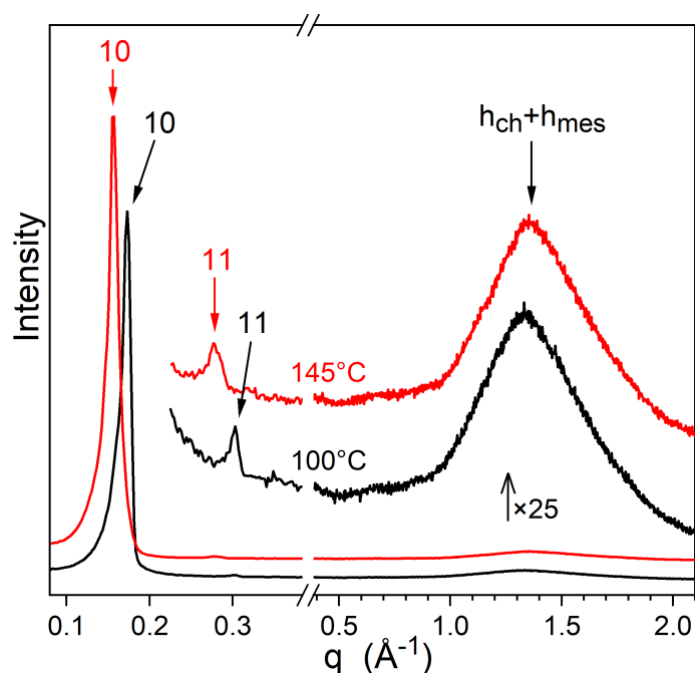

**Fig. S2** SWAXS patterns of ligand **3b** in low- and high-temperature mesophases (black and red) that comply with  $\text{col}_{\text{hex}}$  structures of different lattice parameter, as indicated by the sharp reflections (10) and (11) with spacing ratio  $d_{10}/d_{11} = \sqrt{3}$  and by the broad wide-angle scattering maximum  $h_{\text{ch}}+h_{\text{mes}} \approx 4.7 \text{ \AA}$  from liquid-like lateral distances between molten chains and between mesogens. Therefore, lattice parameter is  $a = (2/\sqrt{3}) \times d_{10} = 41.6 \text{ \AA}$  at  $100^\circ\text{C}$  and  $45.2 \text{ \AA}$  at  $145^\circ\text{C}$ ; columnar cross-sectional surface is  $S_{\text{col}} = (\sqrt{3}/2) \times a^2 = 1770 \text{ \AA}^2$  at  $100^\circ\text{C}$  and  $1500 \text{ \AA}^2$  at  $145^\circ\text{C}$ .

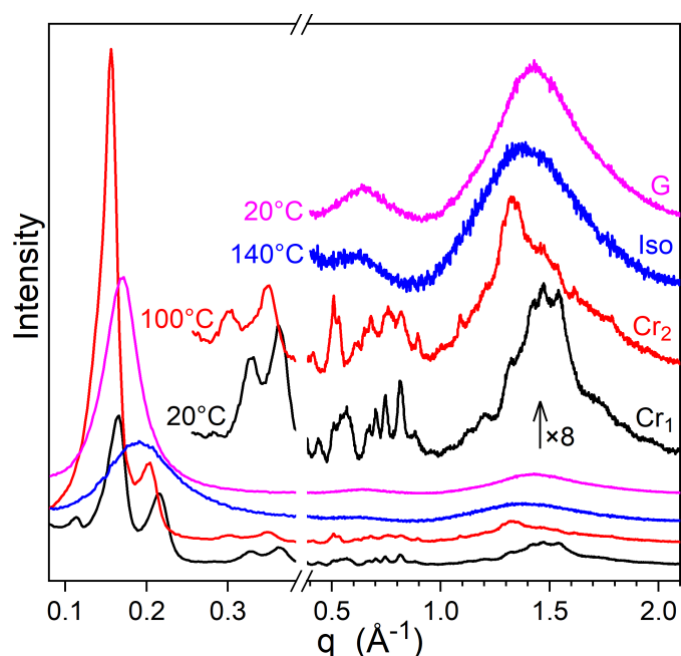

**Fig. S3** SWAXS patterns of  $[\text{Ti}(\mathbf{3b})(\mathbf{4})_2]$  in initial crystal 1 state (black), at  $100^\circ\text{C}$  in crystal 2 state (red), at  $140^\circ\text{C}$  in the isotropic liquid state (blue) and after cooling to  $20^\circ\text{C}$  in the glassy state (pink).

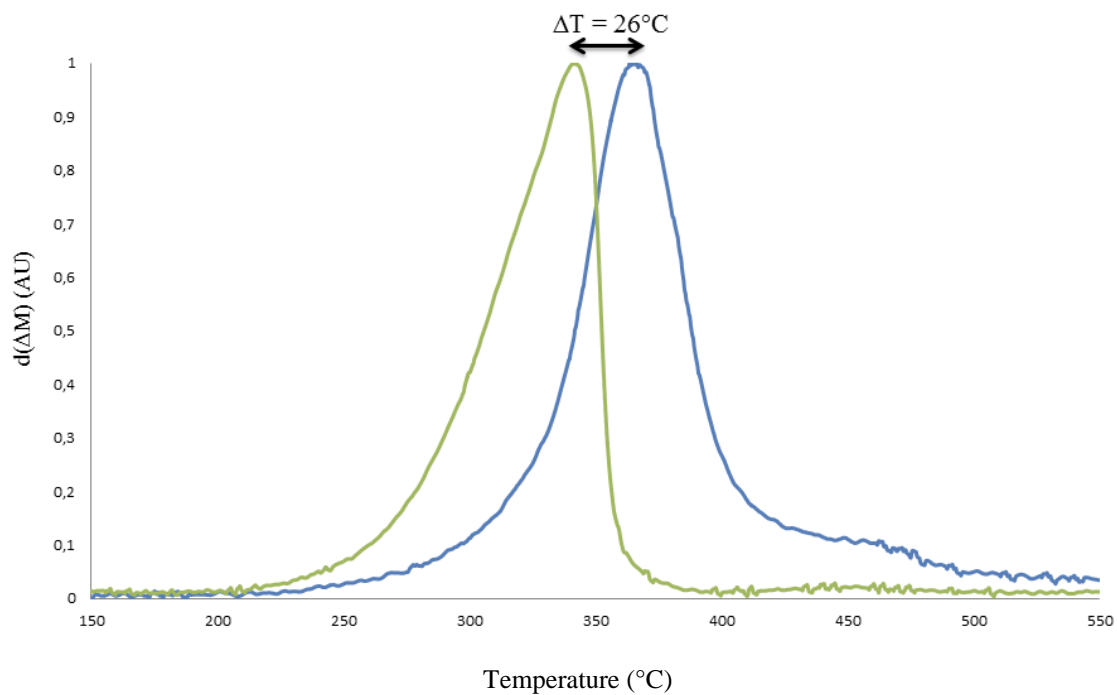

**Fig. S4** Derived TGA thermogram of ligand **1b** (green) and complex  $[\text{Ti}(\mathbf{1b})(\mathbf{4})_2]$  (blue), showing that the analyzed solid sample of the complex contains no free ligand. The thermogravimetric analysis was performed on a Pyris 6 (Perkin Elmer) apparatus.
